# Supplementary material for: Boosting hydrogen evolution through hydrogen spillover promoted by Co-based support effect
Source: Royal Society of Chemistry journal article supplement (doi:10.1039/d2ta09784b), 2023-01-01
Supplement: d2ta09784b1.pdf [file d2ta09784b1.pdf]

## Supplementary Material

# Boosting hydrogen evolution through hydrogen spillover promoted by Co-based support effect

Ya-Nan Zhou <sup>a</sup>, Xin Liu <sup>a</sup>, Cheng-Jie Yu <sup>a</sup>, Bin Dong <sup>\*a</sup>, Guan-Qun Han <sup>b</sup>, Hai-Jun Liu <sup>a</sup>,

Ren-Qing Lv <sup>a</sup>, Bin Liu <sup>a</sup>, Yong-Ming Chai <sup>\*a</sup>

*a State Key Laboratory of Heavy Oil Processing, College of Chemistry & Chemical Engineering,*

*China University of Petroleum (East China), Qingdao 266580, PR China*

*b Department of Chemistry, University of Cincinnati, Cincinnati, Ohio 45221, United States*

---

\* Corresponding author. Email: [dongbin@upc.edu.cn](mailto:dongbin@upc.edu.cn) (B. Dong); [ymchai@upc.edu.cn](mailto:ymchai@upc.edu.cn) (Y.M. Chai)

Tel: +86-532-86981156, Fax: +86-532-86981156

## 1 **Characterization**

2 SEM (JEM 2100F) and TEM (FEI Tecnica G20, 200 kV) were used to characterize the  
3 morphology information of all the synthesized samples. The crystal structure of the samples is  
4 collected by means of X-ray diffraction (XRD) with Cu K $\alpha$  radiation ( $\lambda = 1.54 \text{ \AA}$ ) on the  
5 Brook D8 advance equipment. Energy-dispersive X-ray spectroscopy (EDS) is applied on the  
6 Hitachi S-4800 to obtain the elemental composition and distribution of the resulting sample.  
7 X-ray photoelectron spectroscopy (XPS) is employed to analyze the surface chemical  
8 structure and valence information by Thermo Fisher K-alpha 250Xi. Work function  
9 determination was derived from ultraviolet photoelectron spectroscopy (UPS, ESCALAB 250  
10 Xi spectrometer).

## 11 **Electrochemical measurements**

12 Electrochemical performance measurements were performed at room temperature by a  
13 standard three-electrode system with Gamry Reference 3000 electrochemical equipment. The  
14 cut Ni foam (NF) (1 cm  $\times$  2 cm) was ultrasonically treated with hydrochloric acid, acetone,  
15 ethanol and deionized water, respectively, for 30 min to remove the surface impurity. All  
16 electrochemical measurements were conducted under the same conditions in 0.5 M H<sub>2</sub>SO<sub>4</sub> or  
17 1.0 M KOH. The obtained samples grown on NF (effective electrode area is 2 cm<sup>2</sup>), graphite  
18 rod electrode and saturated calomel electrode (0.5 M H<sub>2</sub>SO<sub>4</sub>)/Hg/HgO electrode (1.0 M KOH)  
19 were selected as working electrode, counter electrode and reference electrode, respectively.  
20 The scan rate of linear sweep voltammetry (LSV) curves was 5 mV s<sup>-1</sup>. In the test process,  
21 positive feedback method is used to conduct IR compensate in real time (95%). All the  
22 electrode potentials were converted to reversible hydrogen electrode (RHE) via the Nernst

1 equation:  $E_{RHE} = E_{SCE} + 0.0592 \text{ pH} + E_{SCE}^0$  ( $E_{SCE}^0 = 0.245 \text{ V}$ ,  $E_{Hg/HgO}^0 = 0.098 \text{ V}$ ). The CV  
 2 curves with different scanning rates (40, 60, 80, 100 and 120  $\text{mV S}^{-1}$ ) are employed to  
 3 determine the double-layer capacitances ( $C_{dl}$ ). Electrochemical active surface area (ECSA)  
 4 was calculated by calculating the current difference at a specific voltage in the non-Faraday  
 5 region. The stability of the sample was evaluated via both chronoamperometry (at 50  $\text{mA cm}^{-2}$ )  
 6 and fast CV cycles with a rate of 40  $\text{mV s}^{-1}$  for 3000 sweeps. The frequency of  
 7 electrochemical impedance spectroscopy (EIS) was gained at a certain potential ranging from  
 8  $10^5 \text{ Hz}$  to 0.1  $\text{Hz}$  with an AC voltage of 5  $\text{mV}$ . All the (over)potentials in this work are  
 9 converted to RHE unless otherwise noted.

## 10 TOF calculation

11 To calculate the per-site turnover frequency (TOF), we used the following formula:

$$12 \quad TOF = \frac{\text{total hydrogen turnovers/cm}^2 \text{ geometric area}}{\text{active sites/cm}^2 \text{ geometric area}}$$

13 The total number of hydrogen turn overs was calculated from the current density  
 14 according to<sup>29-31</sup>:

$$15 \quad \begin{aligned} H_2 &= \left( \frac{j}{\text{cm}^2} \right) \left( \frac{1 \text{ C s}^{-1}}{1000 \text{ mA}} \right) \left( \frac{1 \text{ mol e}^-}{96485.3 \text{ C}} \right) \left( \frac{1 \text{ mol H}_2}{2 \text{ mol e}^-} \right) \left( \frac{6.022 \times 10^{23} \text{ H}_2 \text{ molecules}}{1 \text{ mol H}_2} \right) \\ &= \frac{H_2/s}{\text{cm}^2} \text{ per } \frac{\text{mA}}{\text{cm}^2} \end{aligned}$$

16 Since the exact hydrogen binding site is not known, we estimate the number of active sites  
 17 as the number of surface Co sites, from the roughness factor together with the unit cell of the  
 18  $\text{CoP/CoO}_x/\text{CoS}_x/\text{CoSe}_2$  and  $\text{Pt-CoP/CoO}_x/\text{CoS}_x/\text{CoSe}_2$ . Taking CoP (volume: 89.84  $\text{\AA}^3$ ,  
 19 containing 3 Co atoms) as an example:

1 Active sites per surface area:

$$2 \quad active\ sites = \left( \frac{3\ atoms/unit\ cell}{89.84\ \text{\AA}^3/unit\ cell} \right)^{\frac{2}{3}} = 1.04 \times 10^{15} atoms\ cm_{real}^{-2}$$

3 Finally, plots of current density can be converted into a TOF plot according to:

$$4 \quad TOF = \frac{\left( 3.12 \times 10^{15} \frac{H_2/s}{cm^2} per \frac{mA}{cm^2} \right) \times |j|}{\left( 1.69 \times 10^{15} atoms/cm_{real}^2 \right) \times A_{ECSA}}$$

5 A similar approach was used to estimate TOF for other samples.

## 6 DFT calculation

7 According to XRD patterns, the typical, well-crystallized and unadulterated CoP and  
8 Co<sub>3</sub>O<sub>4</sub> were chosen as the objects to study the hydrogen spillover process. The whole  
9 modeling process refers to the published literature.<sup>32,33</sup> The crystal surface of (011) and (210)  
10 was chosen for CoP and Co<sub>3</sub>O<sub>4</sub> according to XRD and TEM results. In the calculations, the Pt  
11 cluster was built on the CoP (011) and Co<sub>3</sub>O<sub>4</sub> (210) surface with a vacuum region of 20 Å to  
12 reduce dispersive error. The optimized Pt/CoP and Pt-Co<sub>3</sub>O<sub>4</sub> geometries are shown in Fig.  
13 S21. During the interface optimization, single point energy was used to optimize the distance  
14 between Pt clusters and CoP/Co<sub>3</sub>O<sub>4</sub>, then bottom layer of metals and CoP/Co<sub>3</sub>O<sub>4</sub> layers were  
15 fixed in order to reduce the calculation time. The CASTEP module of the Materials Studio  
16 software was employed for the quantum chemistry calculations. Perdew-Burke-Ernzerhof  
17 Generalized-Gradient-Approximation method was used with Density Functional Dispersion  
18 correction to calculate the exchange-correlation energy. Ultrasoft pseudopotential was  
19 selected to describe the characters of ionic cores. During the interface optimization, the top  
20 one layer of CoP was relaxed in order to reduce the calculation time. The k-point is Gamma  
21 point for adsorption thermodynamics. The optimization is completed when the energy,

1 maximum force, maximum stress and maximum displacement are smaller than  $5.0 \times 10^{-6}$   
2  $\text{eV}\cdot\text{atom}^{-1}$ ,  $0.03 \text{ eV}\cdot\text{\AA}^{-1}$ ,  $0.02 \text{ GPa}$  and  $5.0 \times 10^{-4} \text{ \AA}$ , respectively. Gibbs free energy of  
3 adsorption hydrogen atom are calculated by the following equation:  $\Delta G_{\text{H}} = E_{\text{surface}} + H^* -$   
4  $E_{\text{surface}} - 2E_{\text{H}_2} + \Delta E_{\text{ZPE}} - T\Delta S_{\text{H}}$

5 where  $E_{\text{surface}}+H^*$  is the total energy of the system, including the adsorbed molecules  
6 and facet;  $E_{\text{surface}}$  is the energy of the facet;  $E_{\text{H}_2}$  represents the total energy of a gas phase  
7  $\text{H}_2$  molecule;  $\Delta E_{\text{ZPE}}$  denotes the zero-point energy of the system simplified as  $0.05 \text{ eV}$ ; The -  
8  $T\Delta S_{\text{H}}$  is the contribution from entropy at temperature  $\text{K}$ , taken as  $0.20 \text{ eV}$  at  $298 \text{ K}$ .

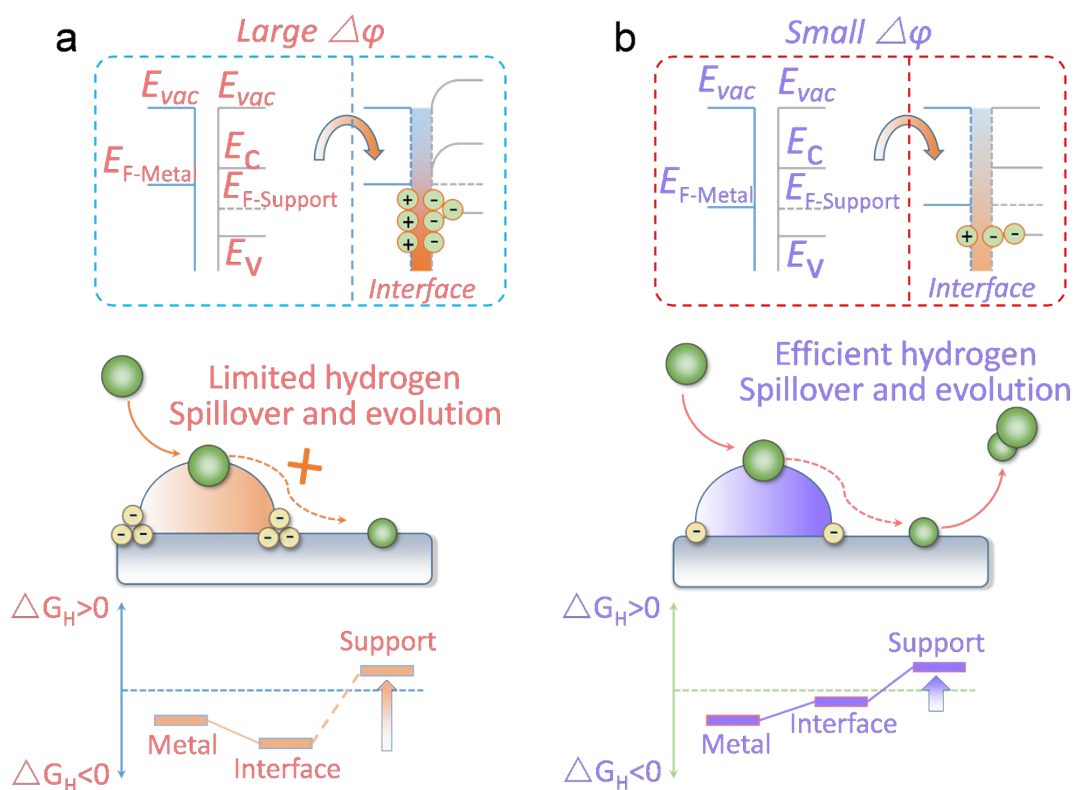

**Fig. S1.** Schematic illustrations of the interfacial electronic configurations and hydrogen spillover phenomenon during HER for the hydrogen-spillover-based binary electrocatalysts with (a) large  $\Delta\Phi$  or (b) small  $\Delta\Phi$ .  $E_{vac}$  = vacuum energy,  $E_C$  = conduction band,  $E_V$  = valence band, and  $E_F$  = Fermi level.

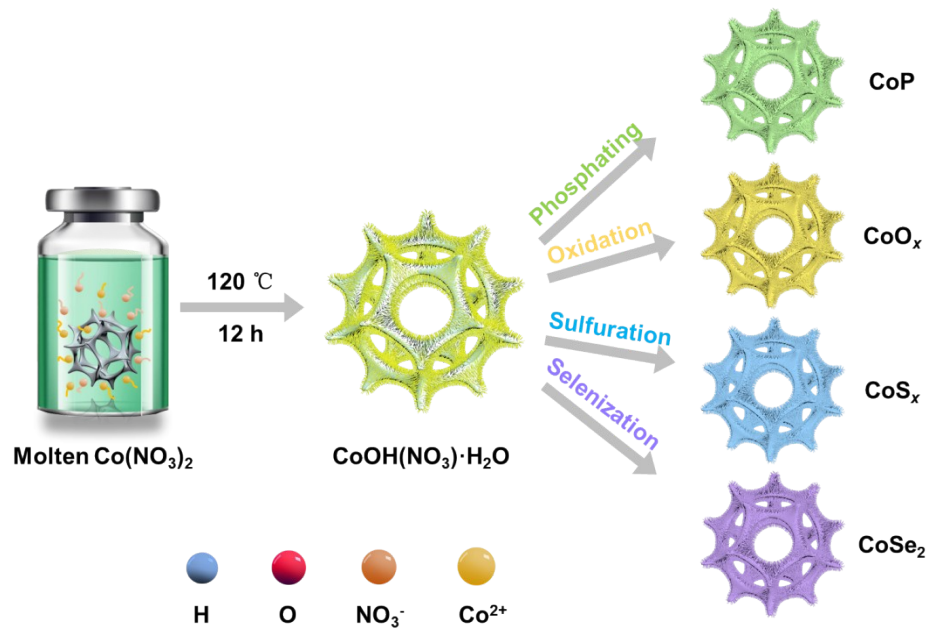

**Fig. S2.** Schematic illustration of the synthesis of  $\text{CoP}$ ,  $\text{CoO}_x$ ,  $\text{CoS}_x$  and  $\text{CoSe}_2$ .

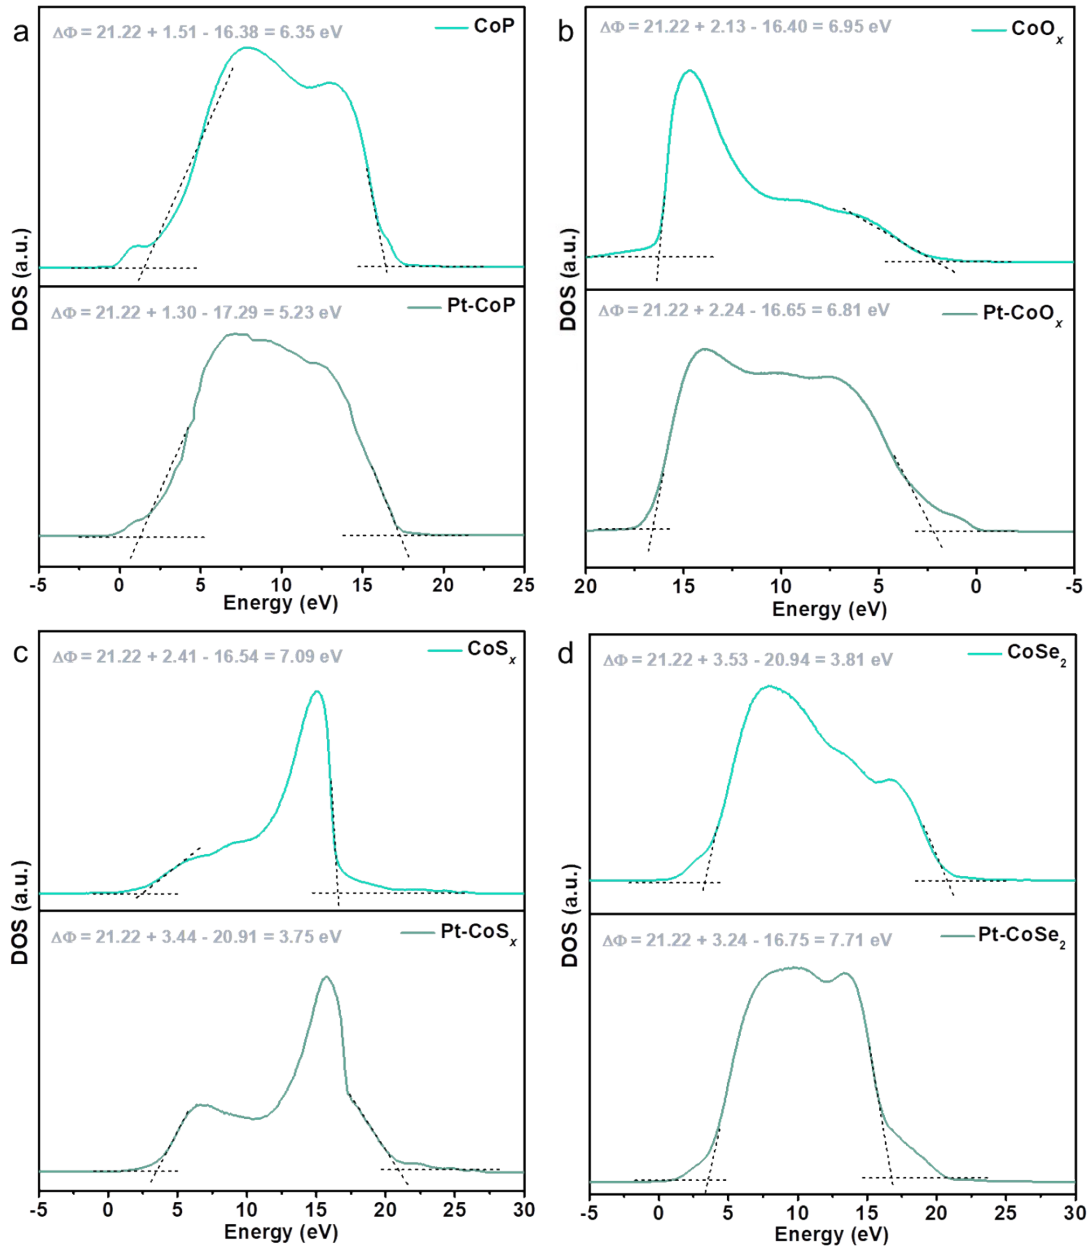

**Fig. S3.** Work function measurements for (a) CoP and Pt-CoP, (b) CoO<sub>x</sub> and Pt-CoO<sub>x</sub>, (c) CoS<sub>x</sub> and Pt-CoS<sub>x</sub>, (d) CoSe<sub>2</sub> and Pt-CoSe<sub>2</sub>.



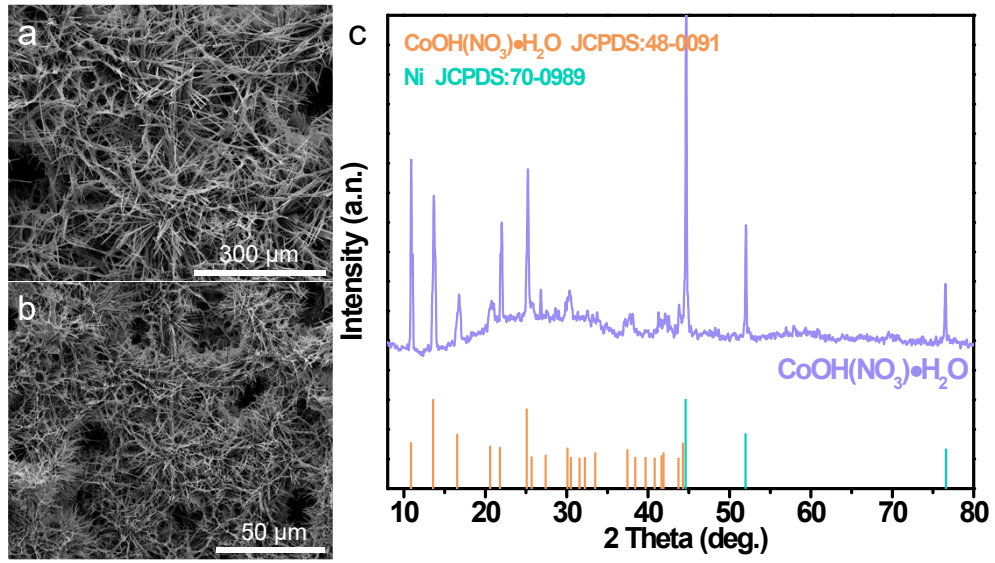

**Fig. S4.** (a,b) SEM images and (c) XRD pattern of  $\text{CoOH}(\text{NO}_3)\cdot\text{H}_2\text{O}$ .  $\text{CoOH}(\text{NO}_3)\cdot\text{H}_2\text{O}$  precursor shows the nanowire structure covering the whole nickel foam.

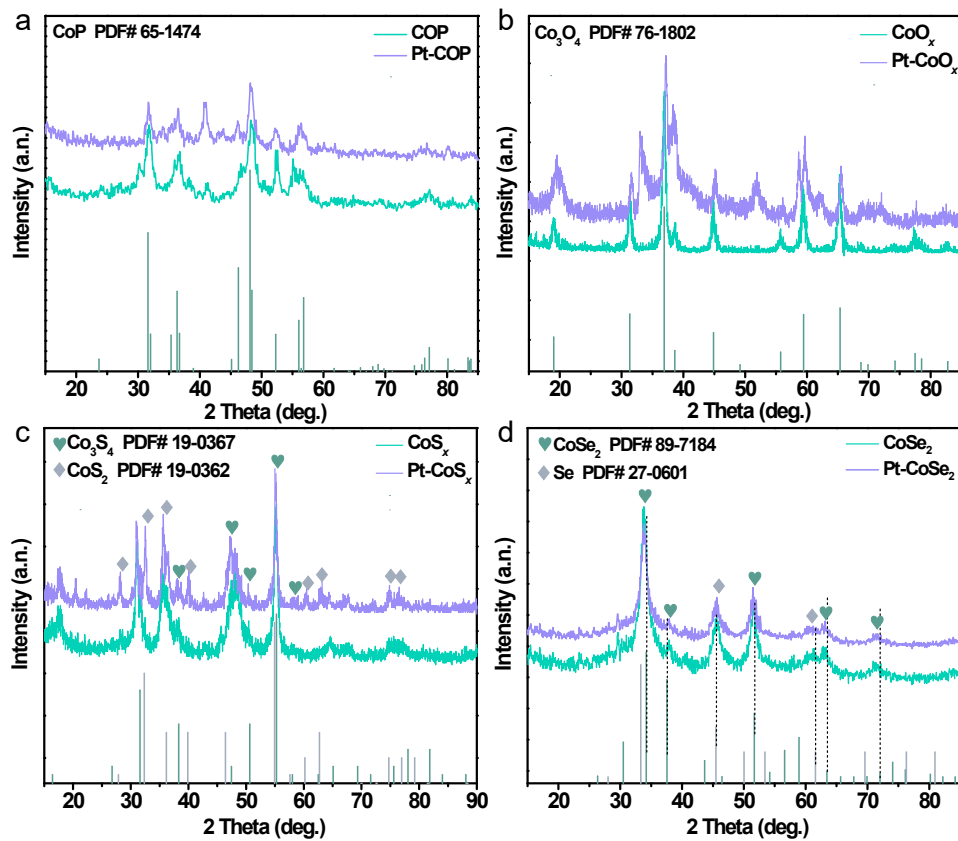

**Fig. S5.** XRD patterns of (a) CoP and Pt-CoP, (b) CoO<sub>x</sub> and Pt-CoO<sub>x</sub>, (c) CoS<sub>x</sub> and Pt-CoS<sub>x</sub>, (d) CoSe<sub>2</sub> and Pt-CoSe<sub>2</sub>. The XRD peaks of (d) show discernible movement, which is due to the lattice distortion or stress.

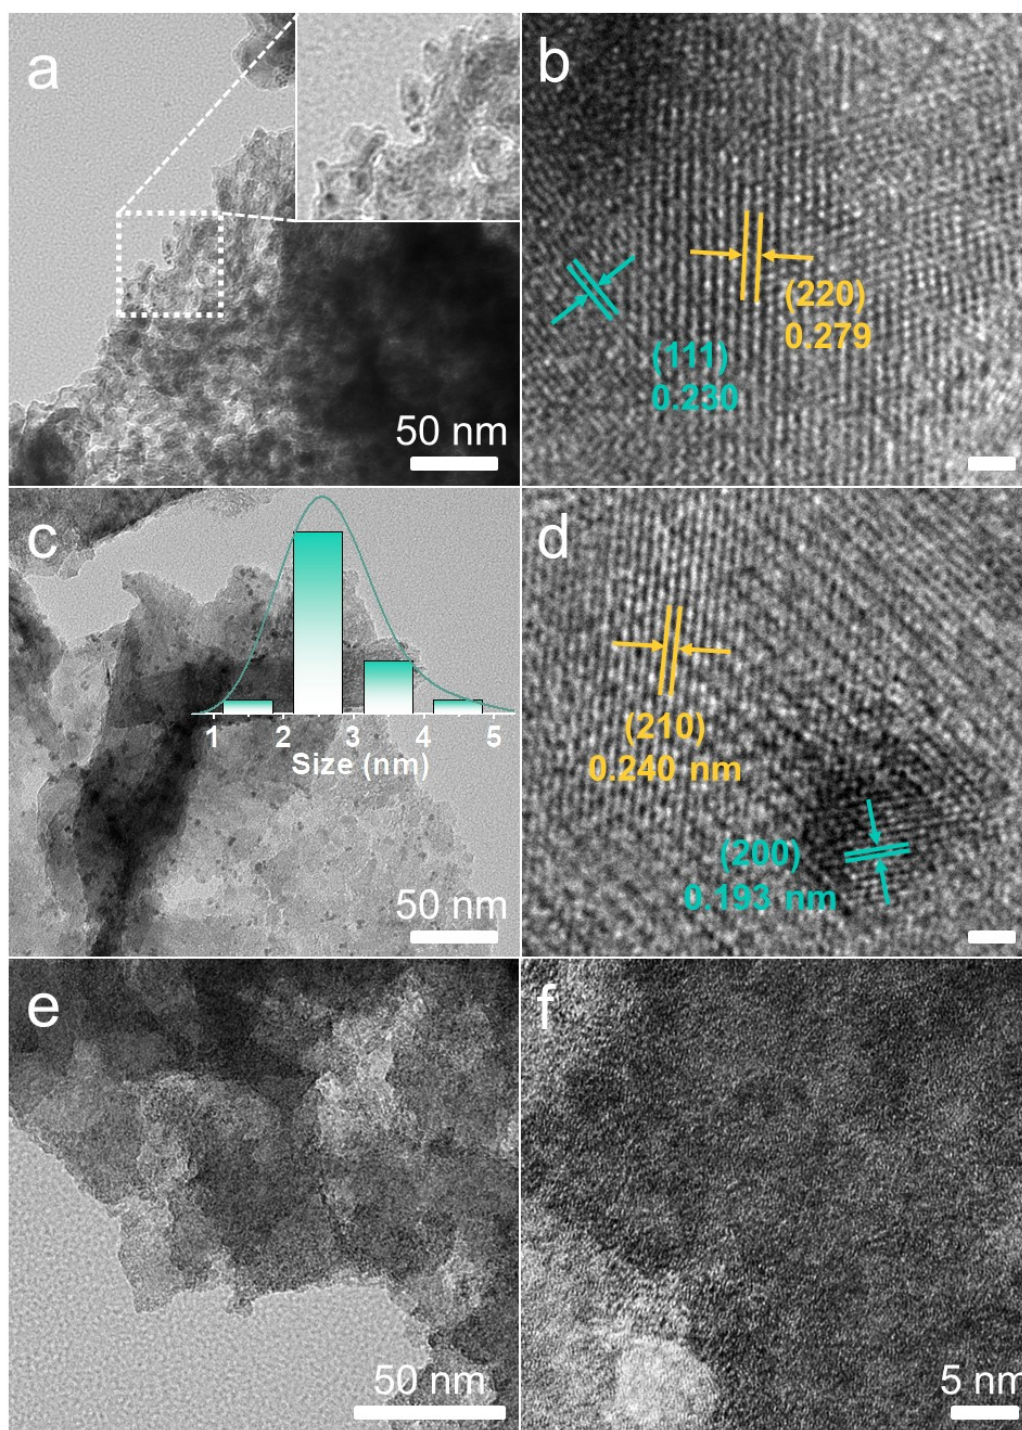

**Fig. S6.** TEM images of (a,b) Pt-CoO<sub>x</sub>, (c,d) Pt-CoS<sub>x</sub>, (e,f) Pt-CoSe<sub>2</sub> scratched off from the as-prepared NF electrode.



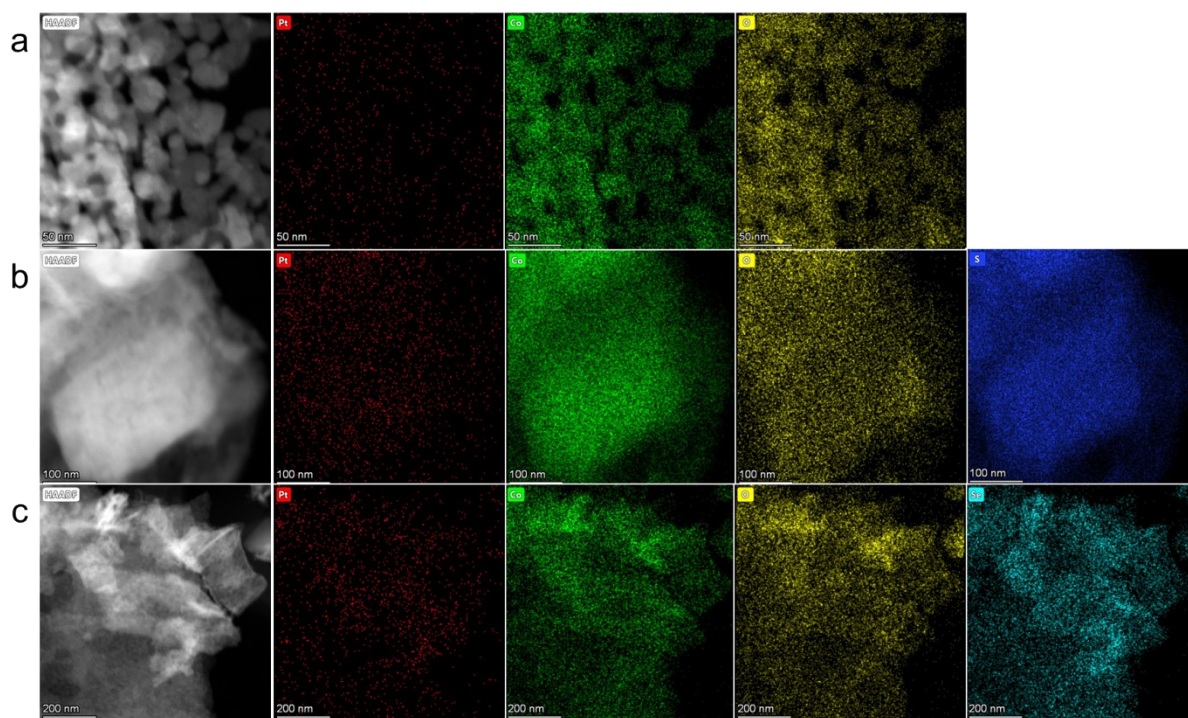

**Fig. S7.** Element images of (a) Pt-CoO<sub>x</sub>, (b) Pt-CoS<sub>x</sub>, (c) Pt-CoSe<sub>2</sub>.

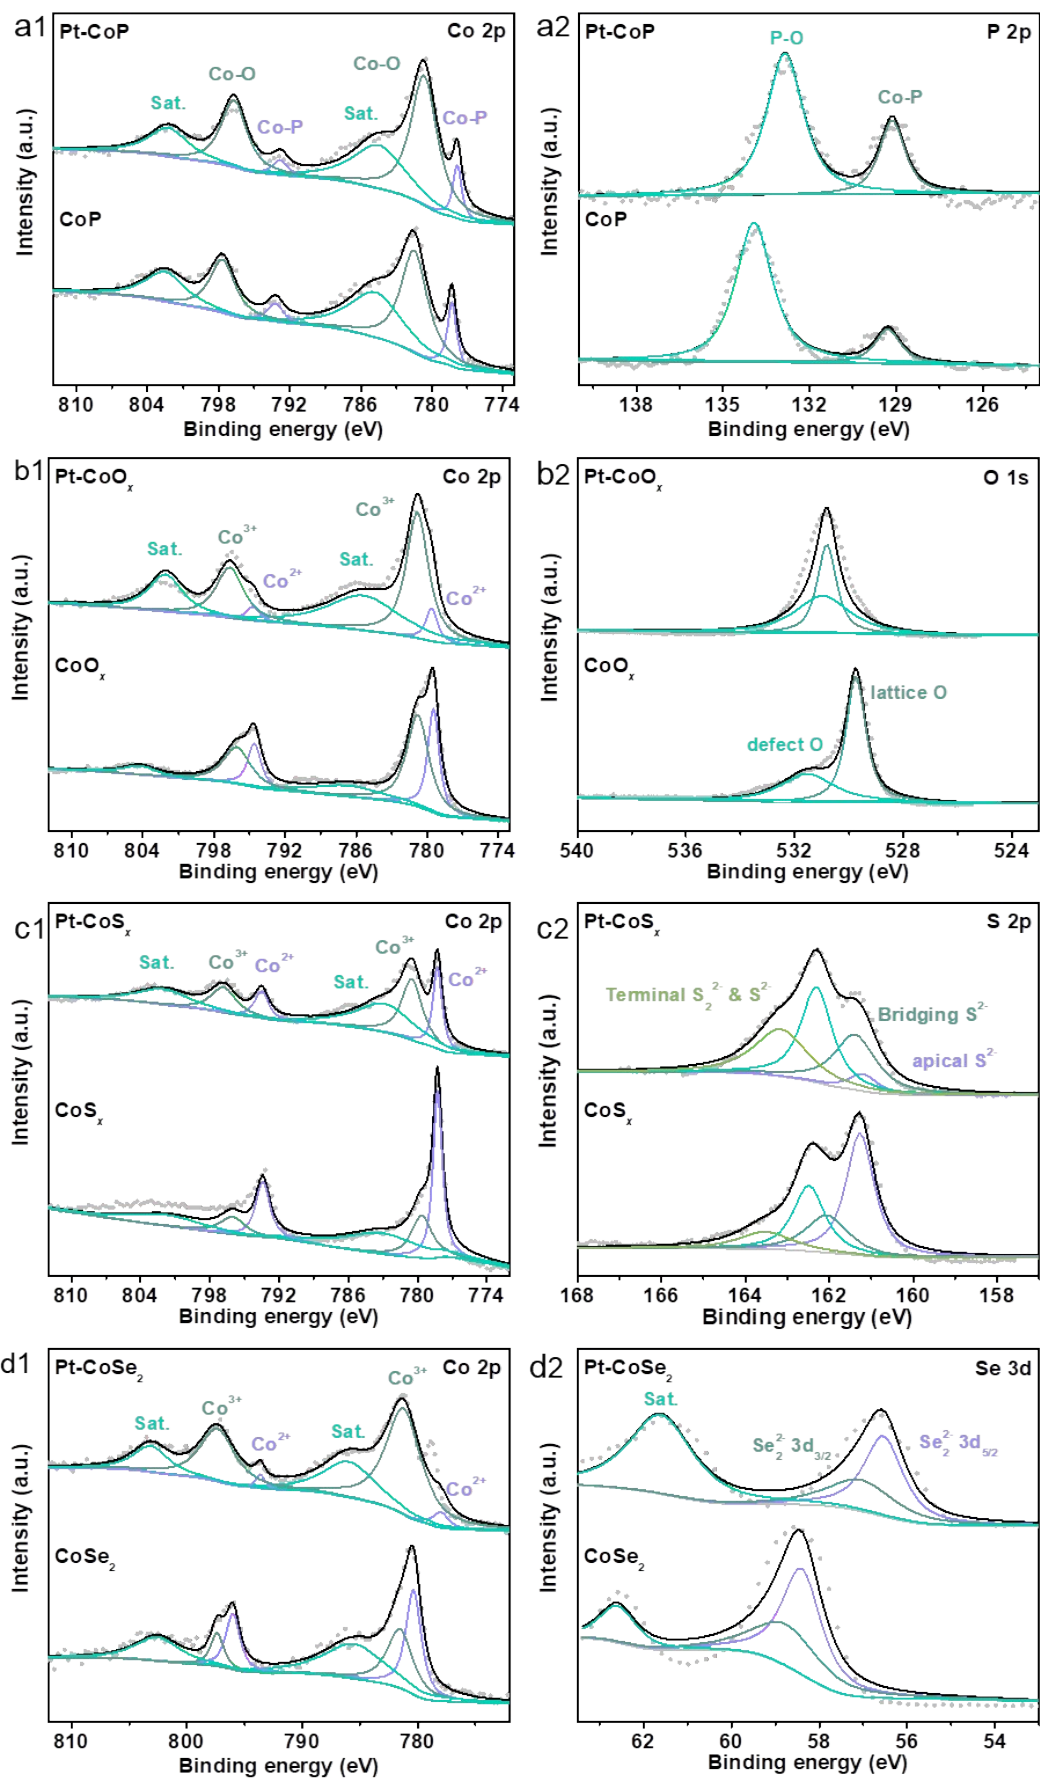

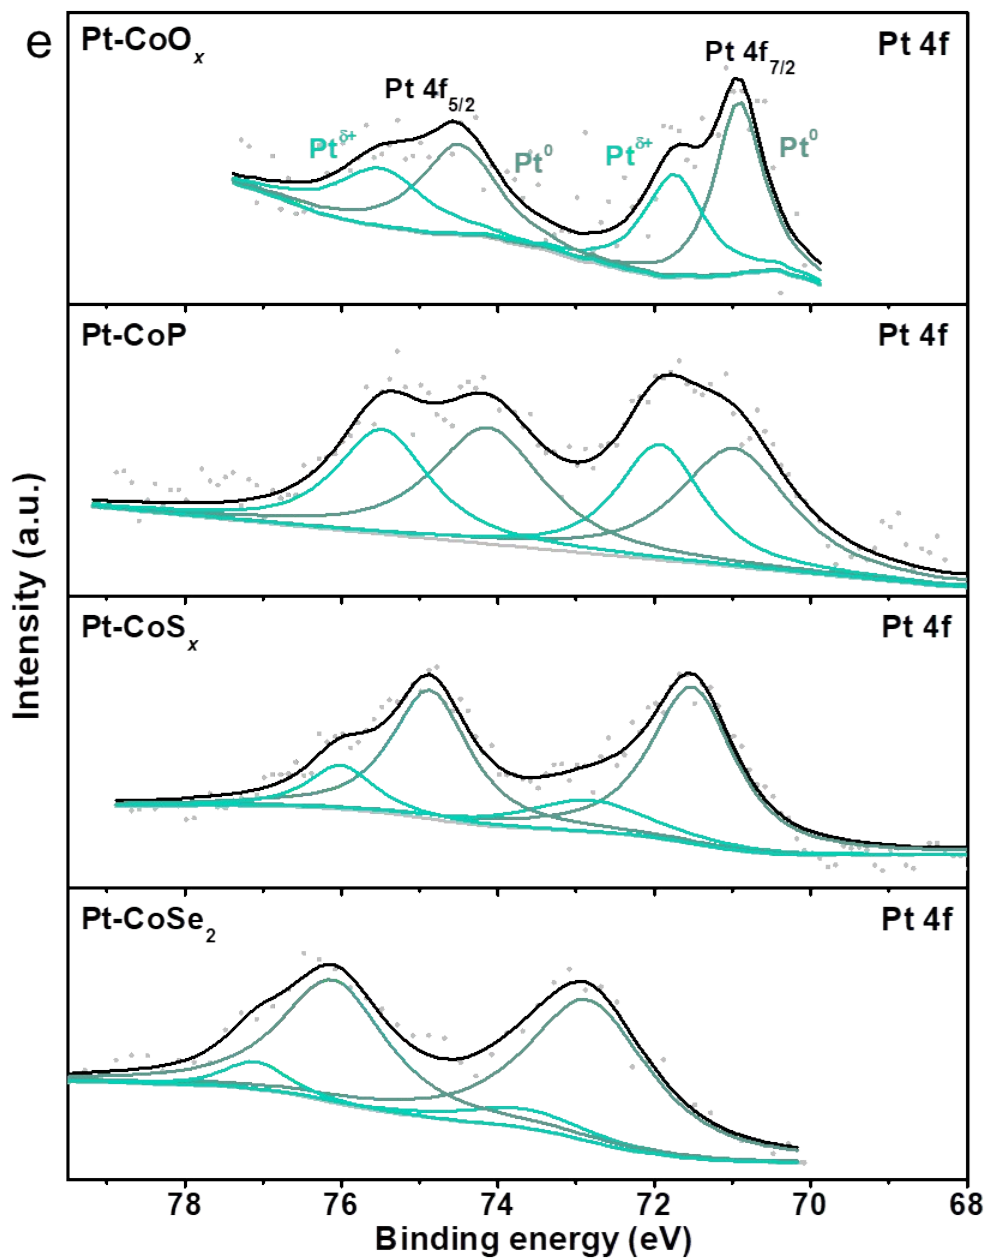

**Fig. S8.** (a1,a2) Co 2p and P 2p of Pt-CoP, (b1,b2) Co 2p and O 1s of Pt-CoO<sub>x</sub>, (c1,c2) Co 2p and S 2p of Pt-CoS<sub>x</sub>, (d1,d2) Co 2p and Se 3d of Pt-CoSe<sub>2</sub>. (e) Pt 4f of various samples.

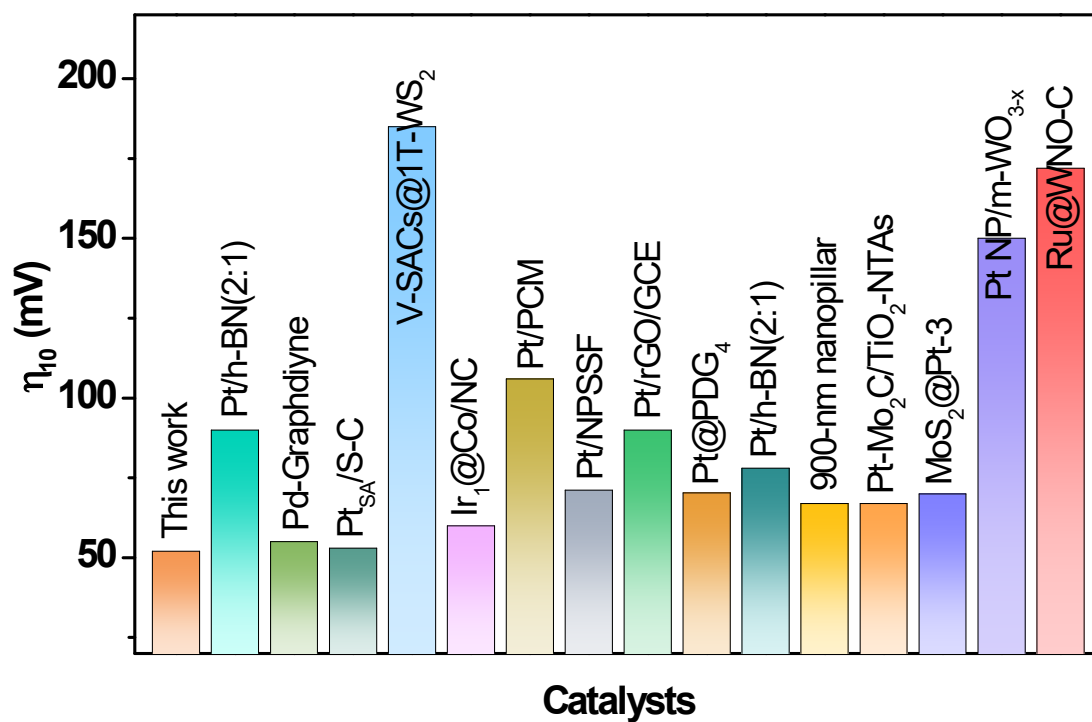

**Fig. S9.** Comparisons of the noble metal activity of Pt-CoP for HER with those of other well-known Pt-based catalysts from Table S2.

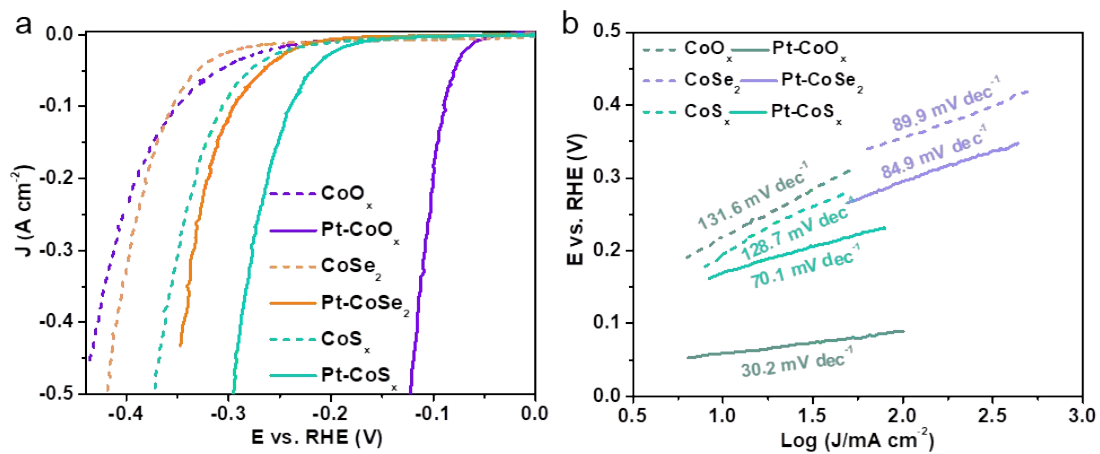

**Fig. S10.** (a) LSV plots and corresponding (b) Tafel slopes of  $\text{CoO}_x$ ,  $\text{CoS}_x$ ,  $\text{CoSe}_2$ ,  $\text{Pt-CoO}_x$ ,  $\text{Pt-CoS}_x$  and  $\text{Pt-CoSe}_2$ .



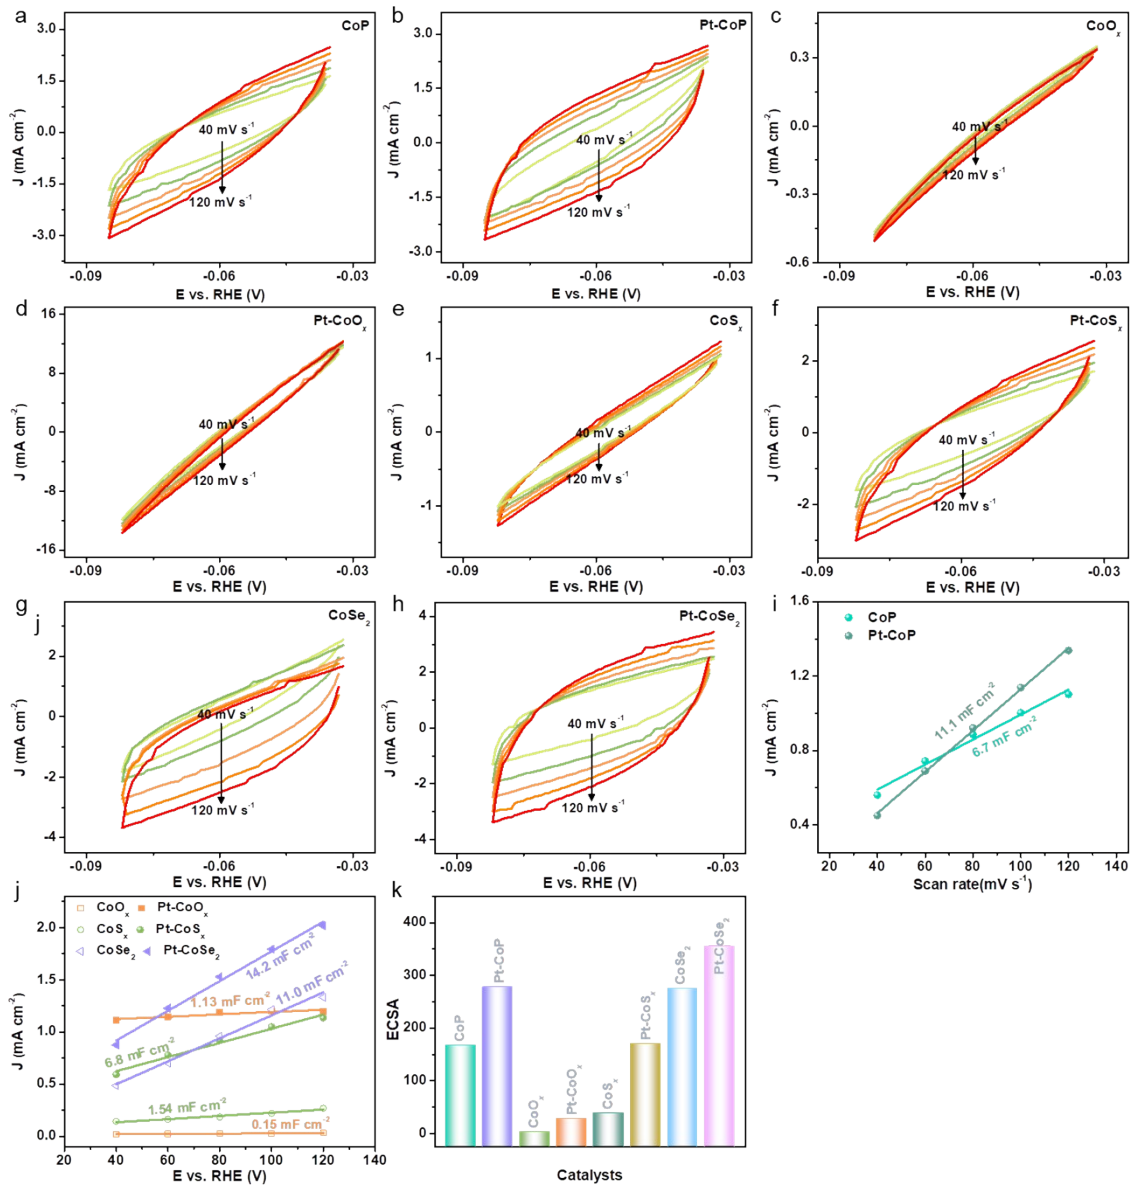

**Fig. S11.** CV curves of obtained samples and corresponding  $C_{dl}$  and ECSA in 0.5 M H<sub>2</sub>SO<sub>4</sub>.

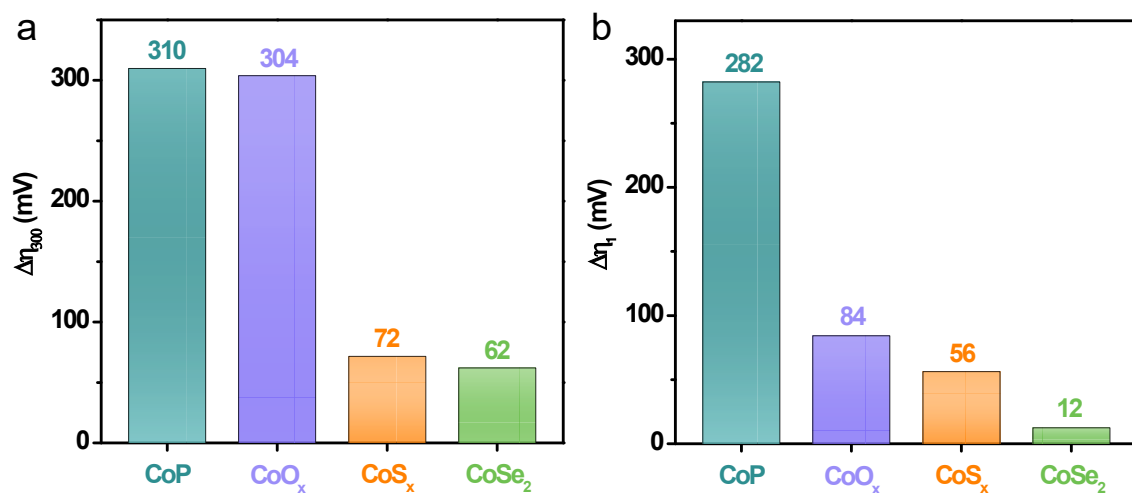

**Fig. S12.** Overpotential difference for CoP, CoO<sub>x</sub>, CoS<sub>x</sub> and CoSe<sub>2</sub> before and after Pt loading at current density of 300 mA cm<sup>-2</sup> in LSV normalized by electrode area (a) and at current density of 1 mA cm<sup>-2</sup> in LSV normalized by ECSA (b).

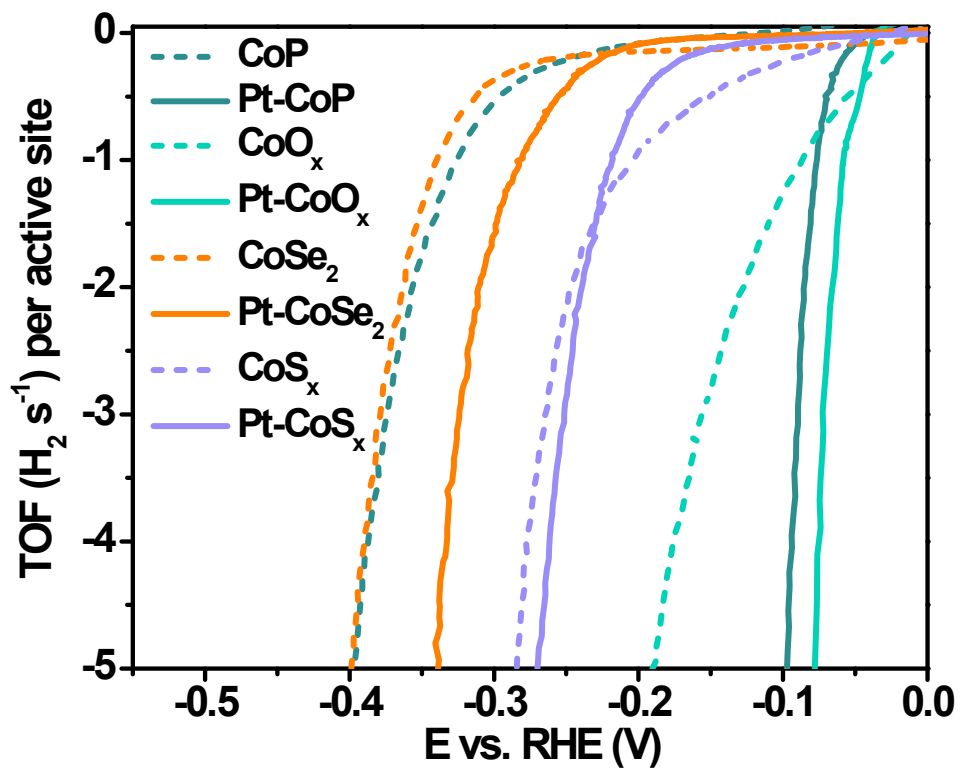

Fig. S13. TOF values of all obtained catalysts in 0.5 M  $\text{H}_2\text{SO}_4$  solution.

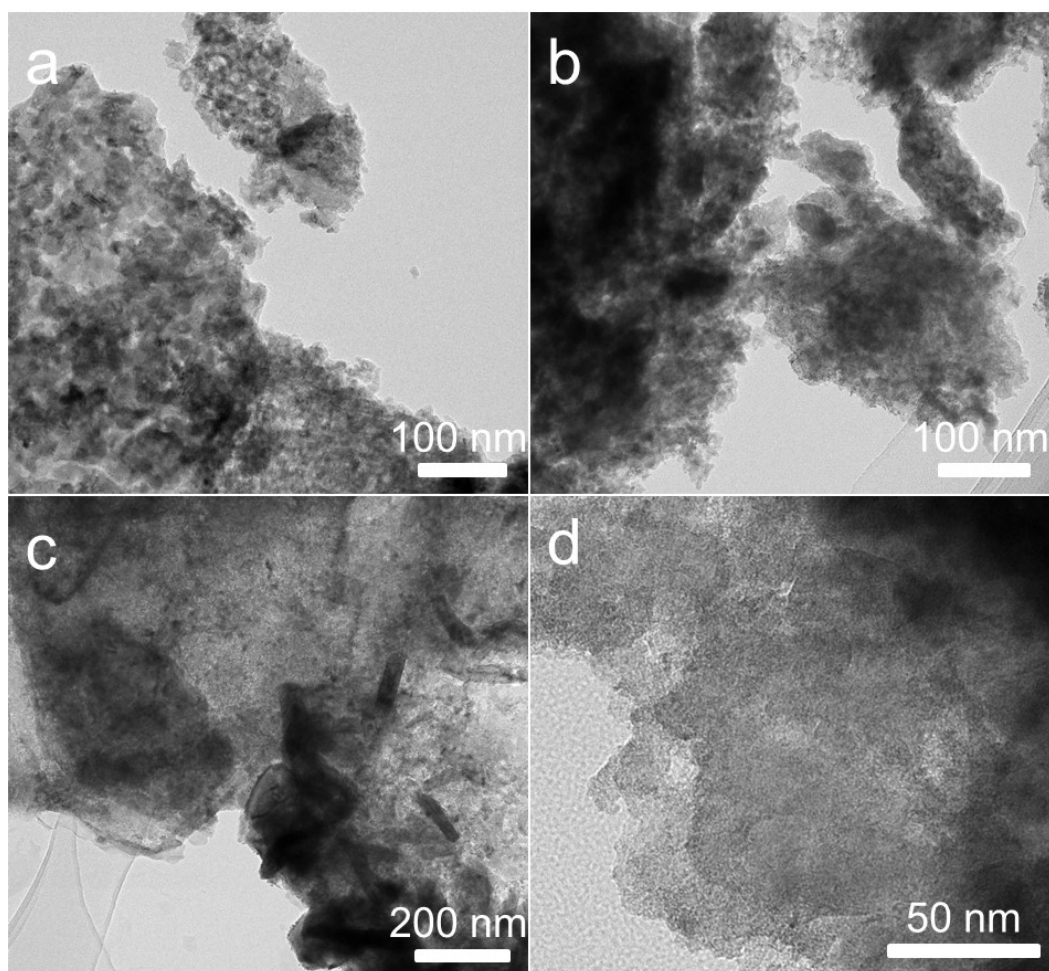

**Fig. S14.** TEM images of (a) Pt-CoP, (b) Pt-CoO<sub>x</sub>, (c) Pt-CoS<sub>x</sub>, (d) Pt-CoSe<sub>2</sub> after long-term stability in acidic media.

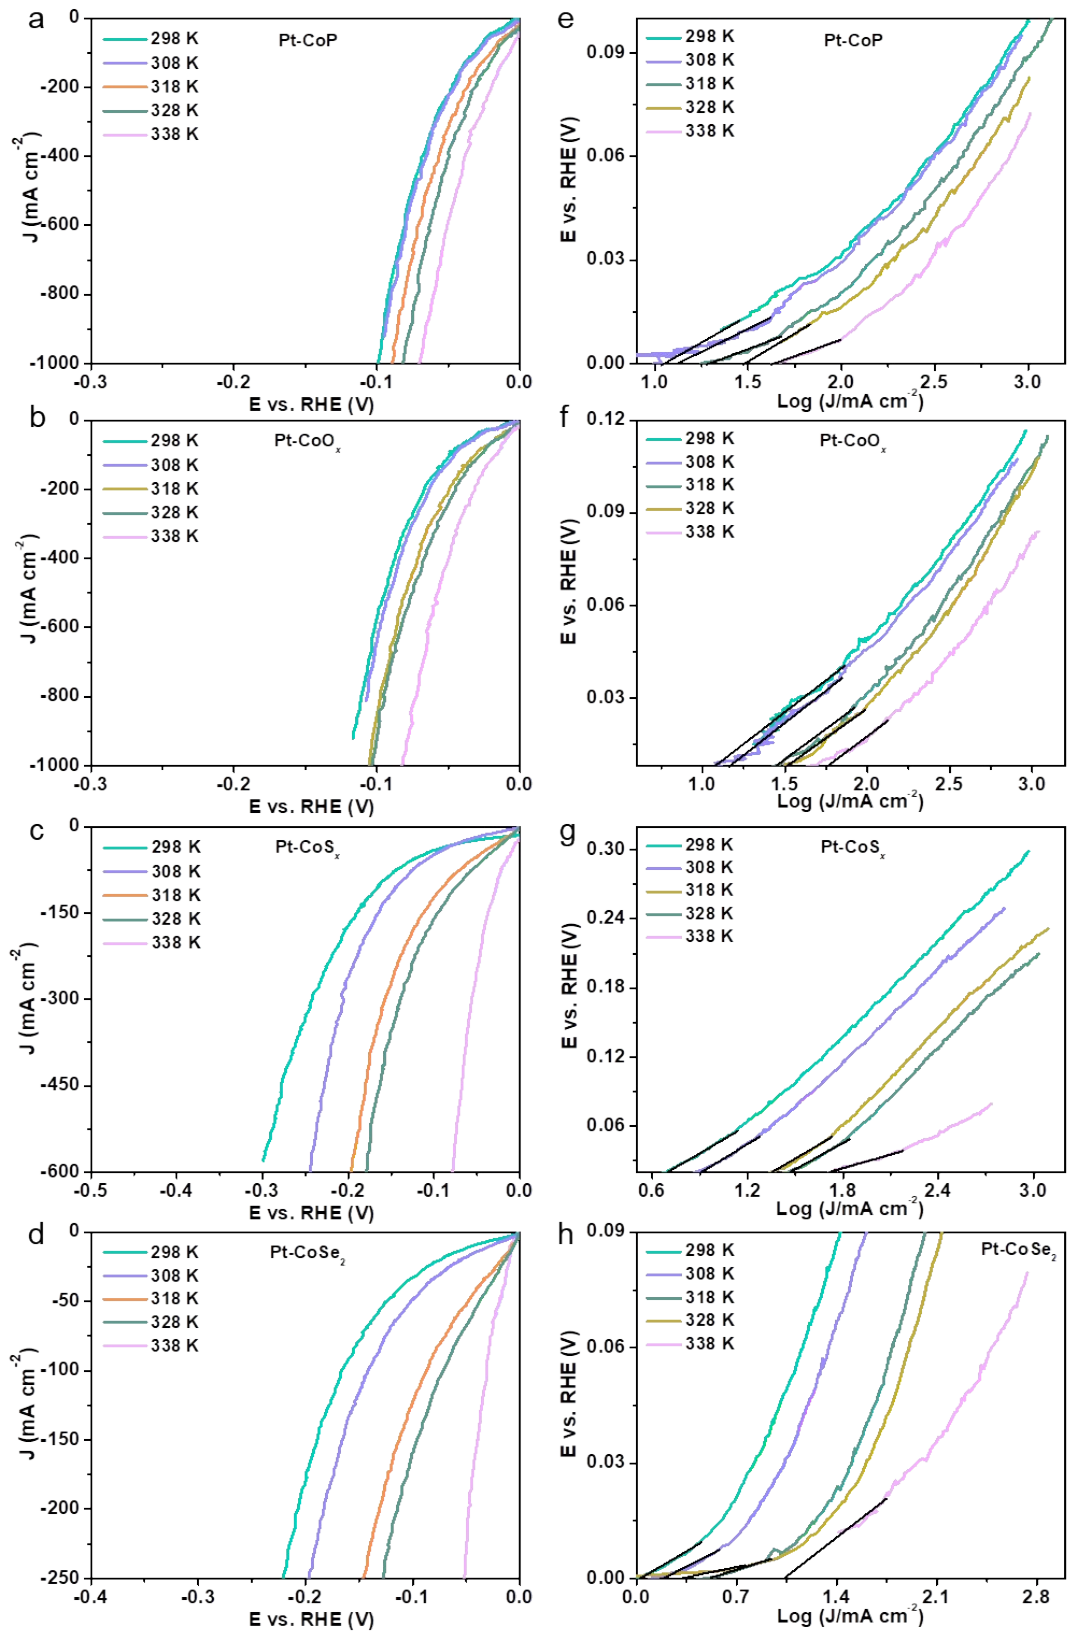

**Fig. S15.** (a-d) LSV curves of Pt-CoP, Pt-CoO<sub>x</sub>, Pt-CoS<sub>x</sub>, Pt-CoSe<sub>2</sub> and corresponding Tafel slopes in Ar-saturated 0.5 M H<sub>2</sub>SO<sub>4</sub> at different temperatures from 298 to 338 K.

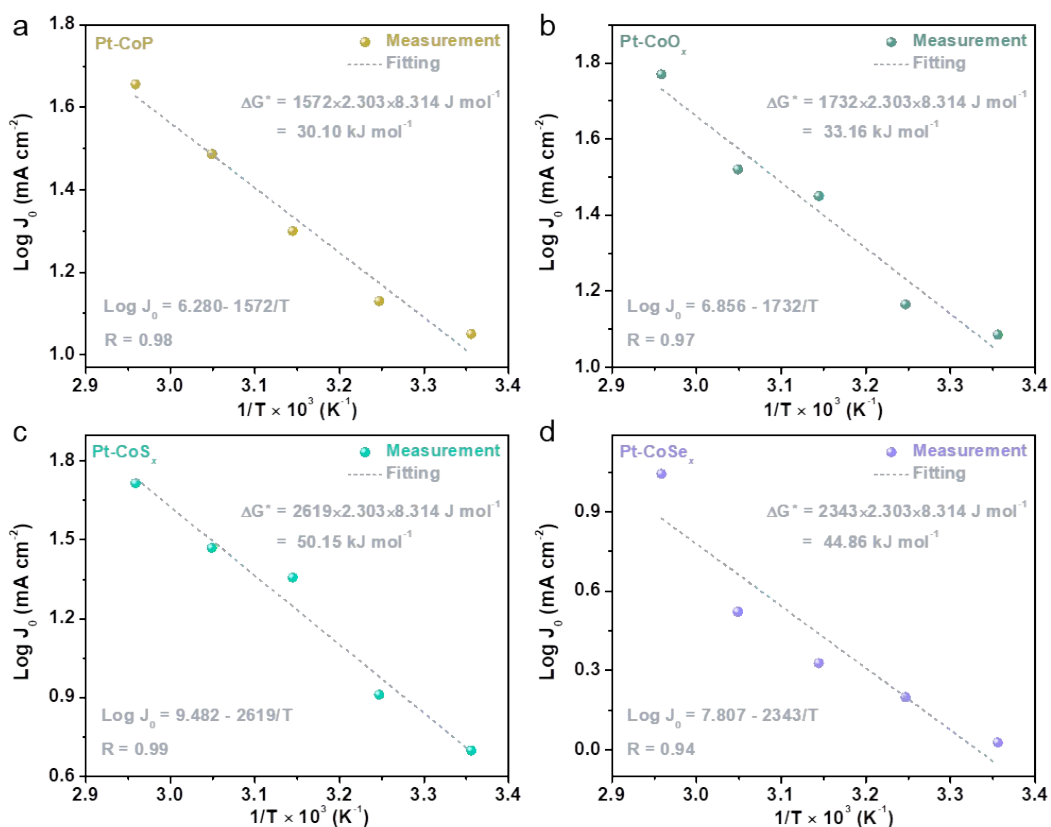

**Fig. S16.** Typical Arrhenius plots for the (a) Pt-CoP, (b) Pt-CoO $_x$ , (c) Pt-CoS $_x$ , (d) Pt-CoSe $_2$  catalysts. The calculation of the  $\Delta G^*$  is based on the Arrhenius equation:  $\log j_0 = \log (FK_c) - \Delta G^*/2.303RT$ .

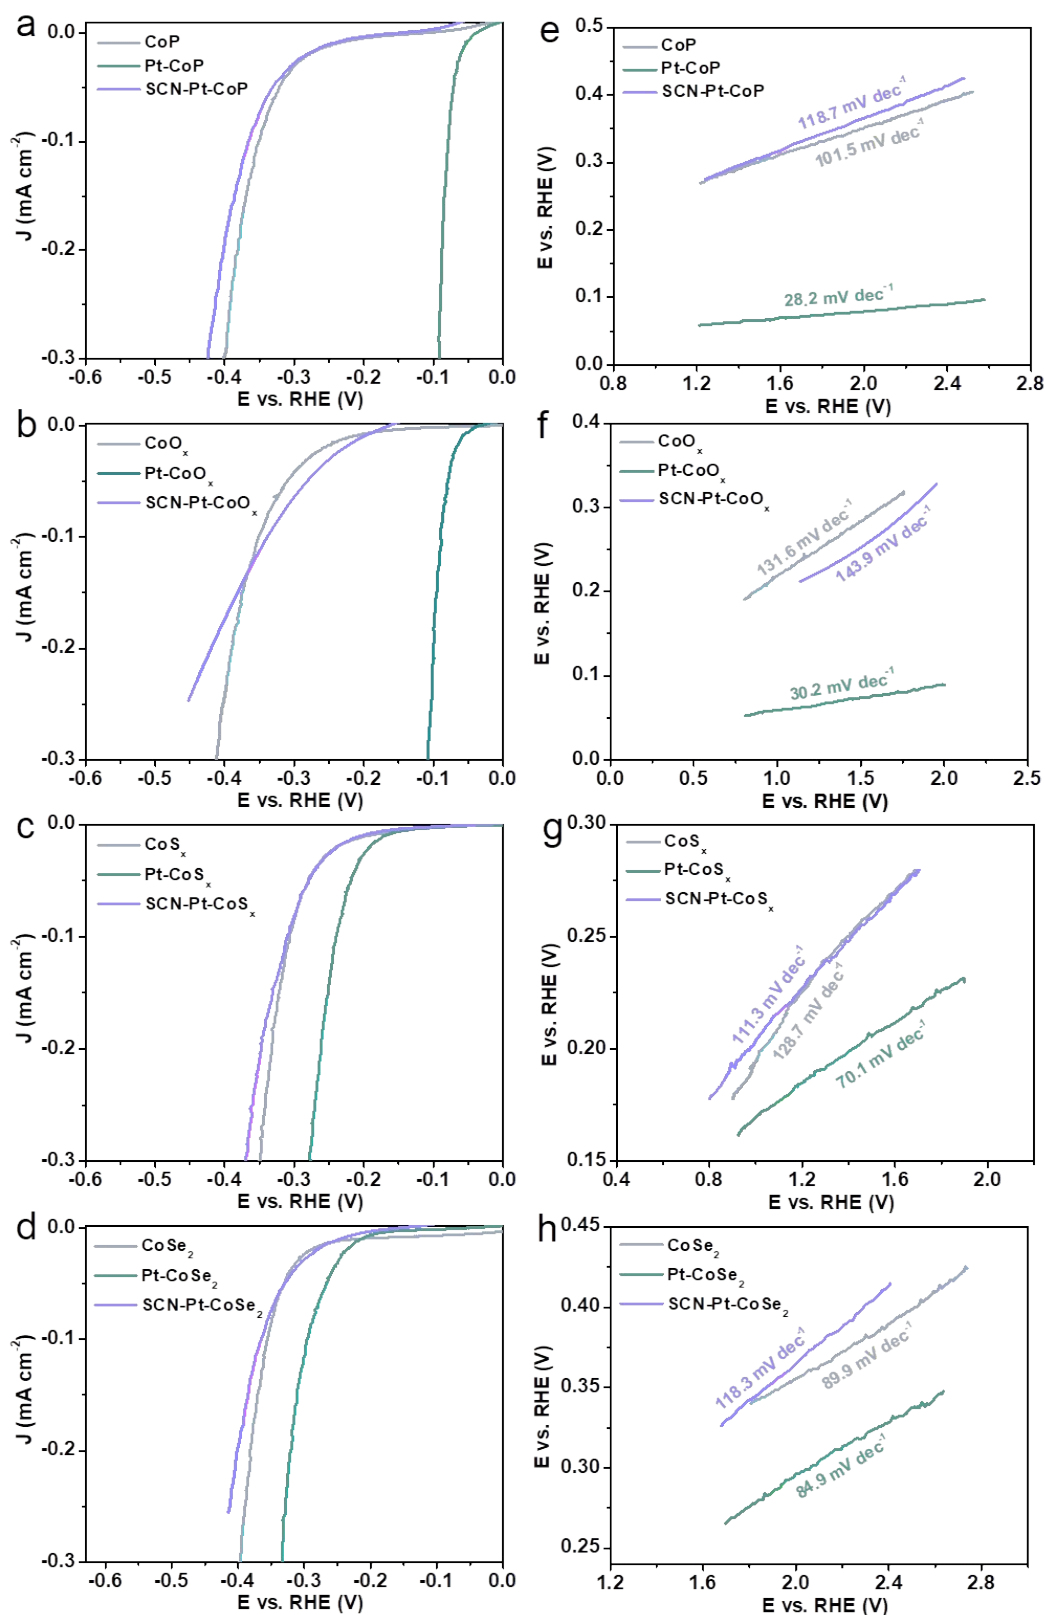

**Fig. S17.** HER performance of Pt-CoP, Pt-CoO<sub>x</sub>, Pt-CoS<sub>x</sub>, Pt-CoSe<sub>2</sub> catalysts in the presence or absence of SCN<sup>-</sup> probe.

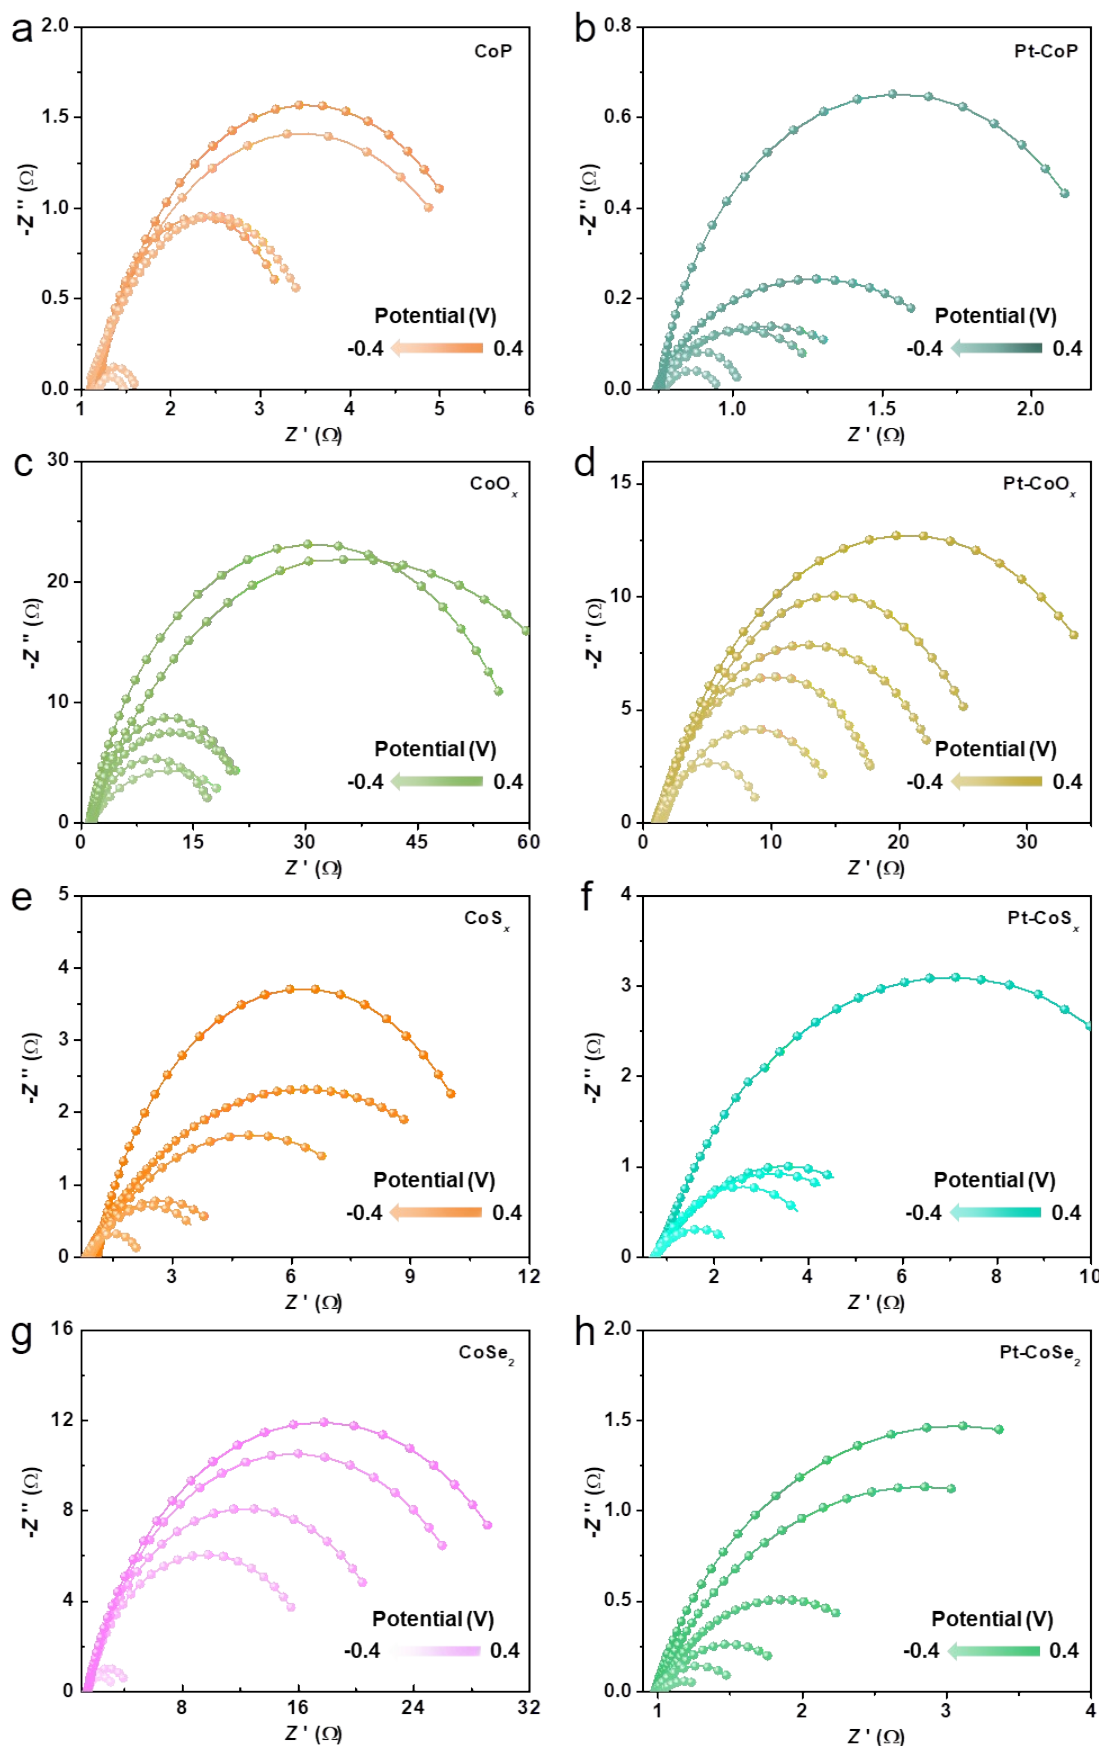

**Fig. S18.** EIS analysis in Ar-saturated 0.5 M H<sub>2</sub>SO<sub>4</sub>. Nyquist plots for obtained samples with



the model as follows:

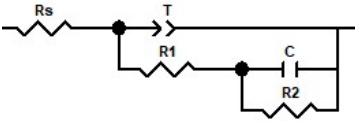

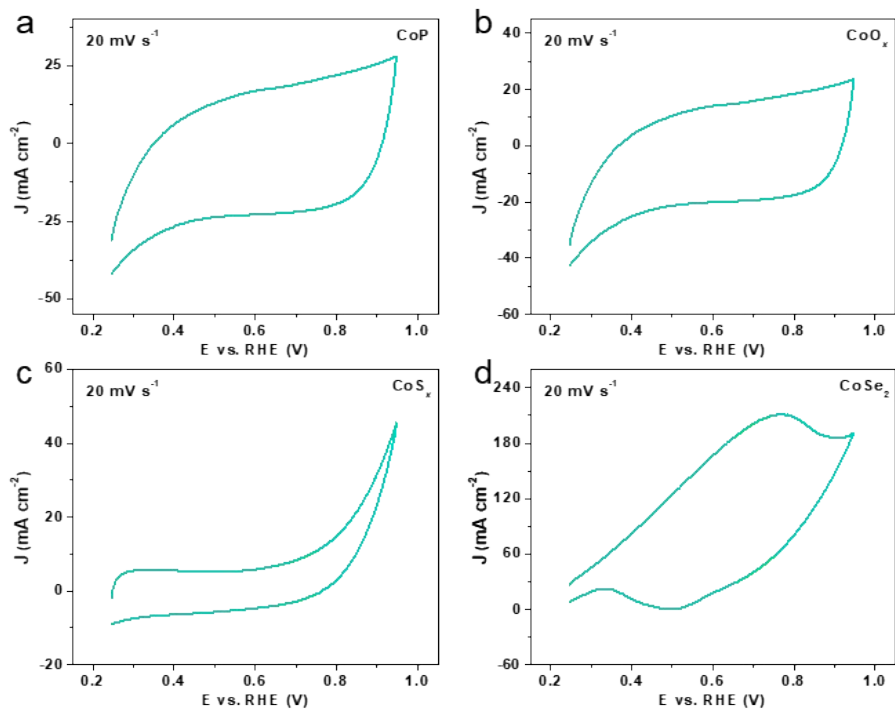

**Fig. S19.** CV curves of (a) CoP, (b) CoO<sub>x</sub>, (c) CoS<sub>x</sub>, (d) CoSe<sub>2</sub> catalysts.

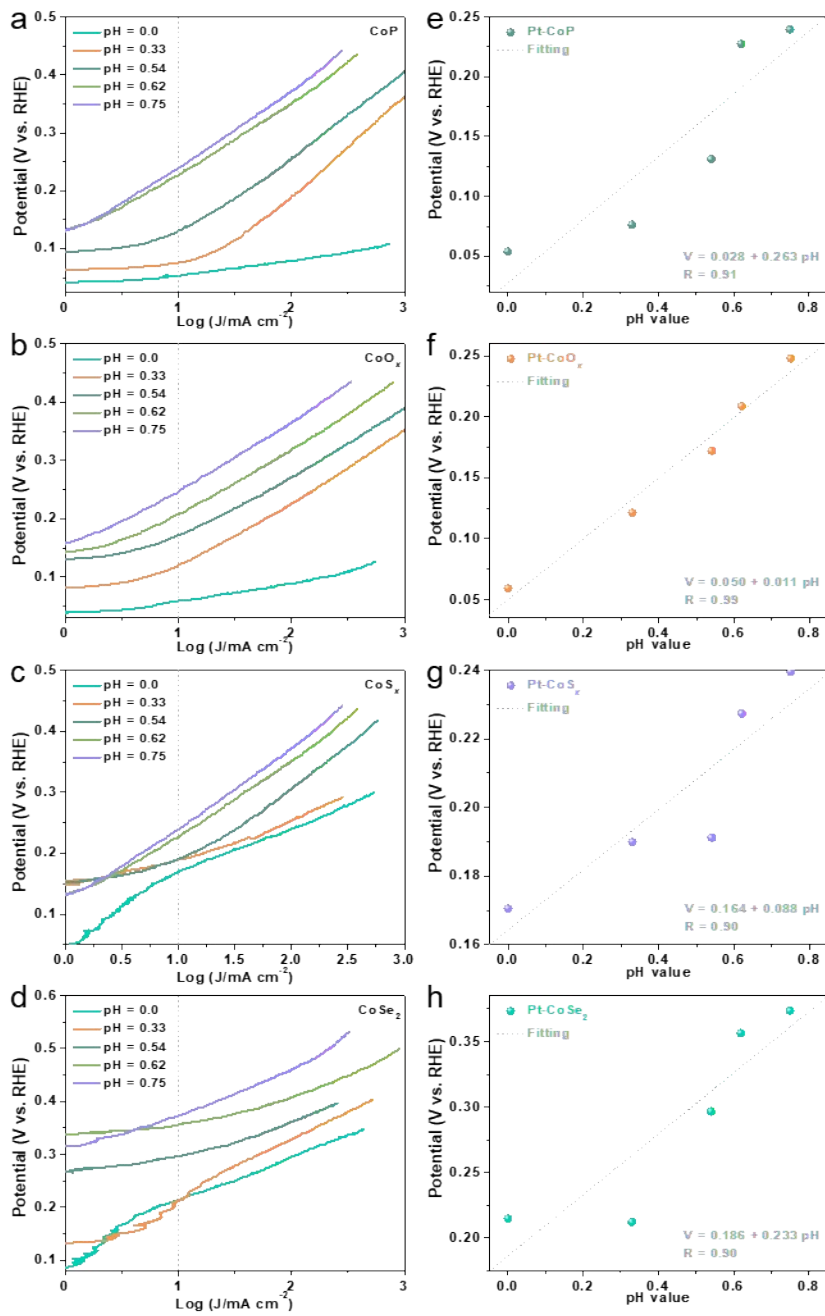

**Fig. S20.** (a) Tafel curves of obtained catalysts in Ar-saturated H<sub>2</sub>SO<sub>4</sub> electrolyte with pH ranging from 0 to 0.75. (b) Plots of potential at 10 mA cm<sup>-2</sup> vs. pH for Pt-CoP, Pt-CoO<sub>x</sub>, Pt-CoS<sub>x</sub>, Pt-CoSe<sub>2</sub>.

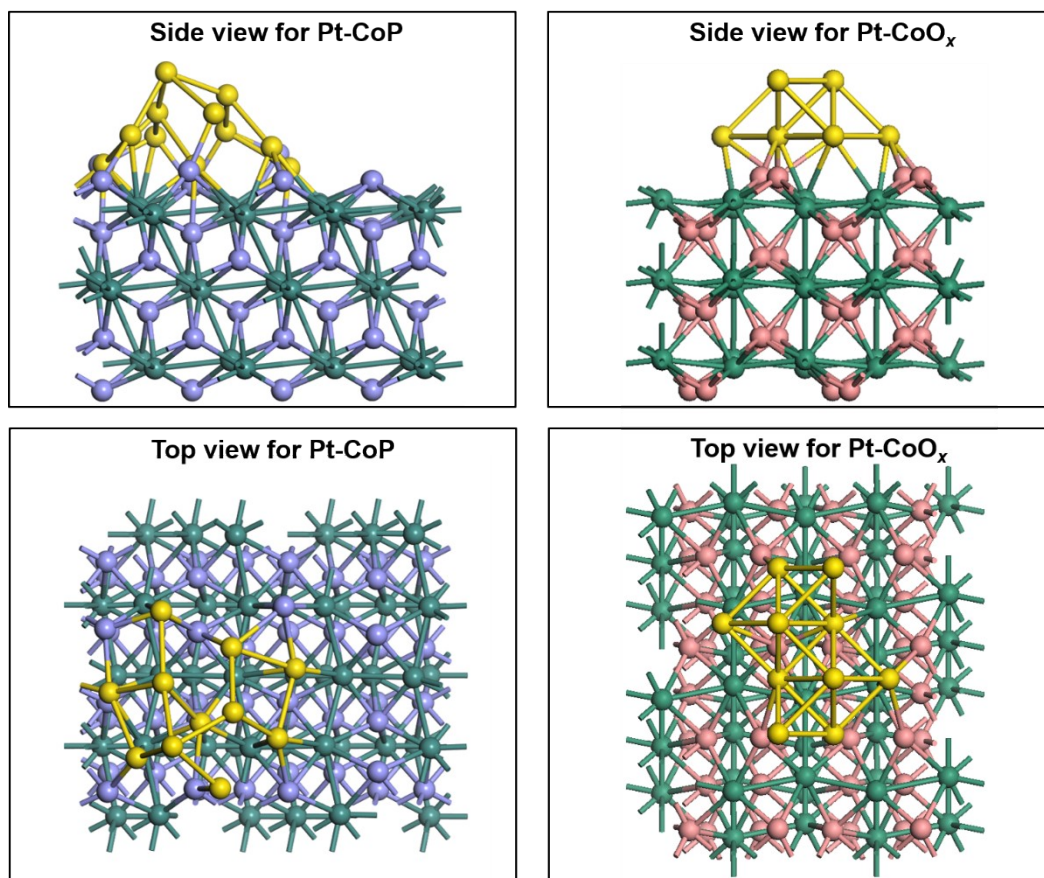

**Fig. S21.** Side and top view of Pt-CoP and Pt-CoO<sub>x</sub> surfaces.

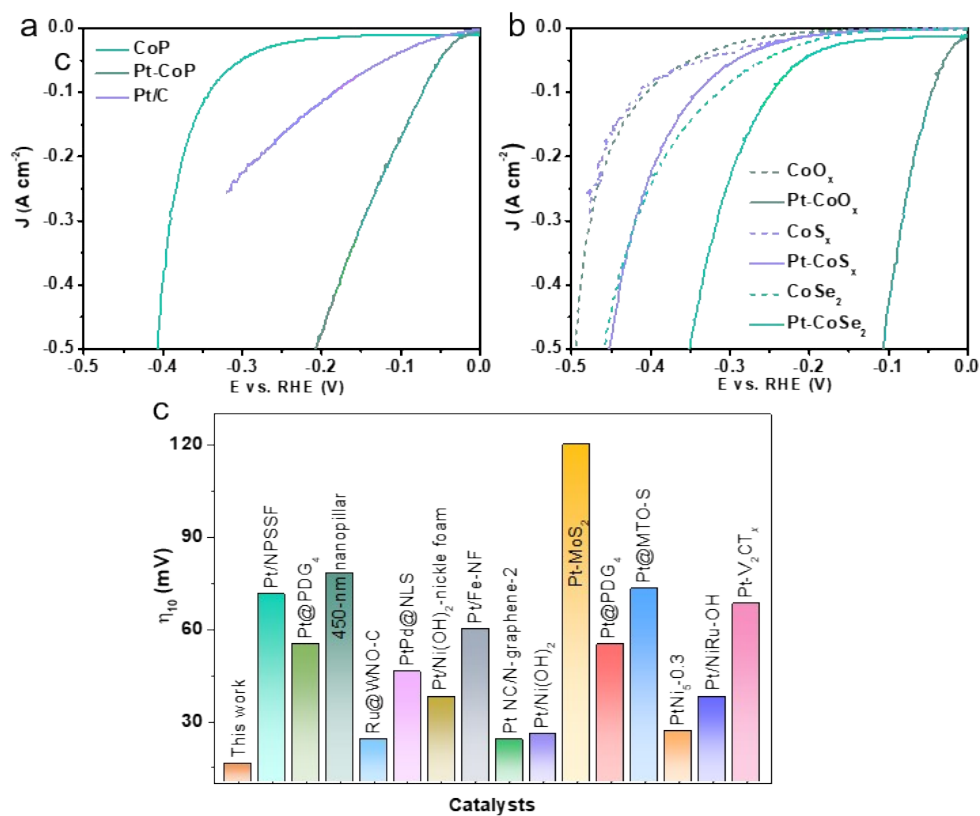

**Fig. S22.** HER activity of obtained catalysts in 0.5 M H<sub>2</sub>SO<sub>4</sub>. (a,b) LSV curves, (c) comparison of overpotential at 10 mA cm<sup>-2</sup>.

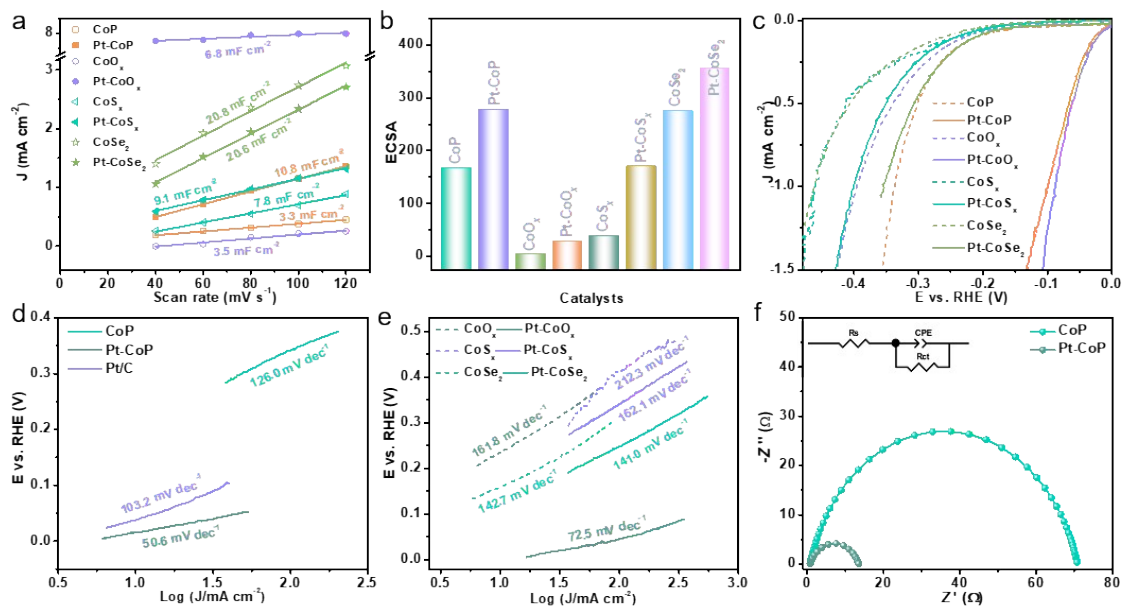

**Fig. S23.** HER performance of obtained catalysts in 0.5 M H<sub>2</sub>SO<sub>4</sub>. (a) C<sub>dl</sub>, (b) ECSA, (c) ECSA-normalized LSV plots, (d,e) Tafel slopes, (f) EIS plots.

**Table S1** Element contents of Pt-CoP, Pt-CoO<sub>x</sub>, Pt-CoS<sub>x</sub>, Pt-CoSe<sub>2</sub>.

| Element | Pt-CoP |       | Pt-CoO <sub>x</sub> |       | Pt-CoS <sub>x</sub> |       | Pt-CoSe <sub>2</sub> |       |
|---------|--------|-------|---------------------|-------|---------------------|-------|----------------------|-------|
|         | At.%   | Wt.%  | At.%                | Wt.%  | At.%                | Wt.%  | At.%                 | Wt.%  |
| Pt      | 0.20   | 1.09  | 0.07                | 0.48  | 0.07                | 0.35  | 0.30                 | 1.32  |
| Co      | 34.22  | 57.20 | 32.04               | 63.18 | 32.50               | 48.78 | 25.84                | 33.76 |
| P       | 28.12  | 24.70 | -                   | -     | -                   | -     | -                    | -     |
| S       | -      | -     | -                   | -     | 57.21               | 46.71 | -                    | -     |
| O       | 37.46  | 17.00 | 67.88               | 36.34 | 10.21               | 4.16  | 46.11                | 16.36 |
| Se      | -      | -     | -                   | -     | -                   | -     | 27.74                | 48.57 |

**Table S2.** Comparison of HER performance in acidic media for best-performing Pt/CoP with the noble-metal based catalysts.

| Catalysts                                  | Loading of noble metal | $\eta_{10}$ (mV) | Tafel slope (mV dec <sup>-1</sup> ) | Reference |
|--------------------------------------------|------------------------|------------------|-------------------------------------|-----------|
| Pt/CoP                                     | 0.12 at.%              | 52               | 28.2                                | This work |
| Pt/h-BN (2:1)                              | -                      | 90               | 34                                  | 1         |
| Pd-Graphdiyne                              | 0.2 wt.%               | 55               | 47                                  | 2         |
| Pt <sub>SA</sub> /S-C                      | 5.0 wt.%               | 53               | 46                                  | 3         |
| V-SACs@1T-WS <sub>2</sub>                  | 2.0 wt.%               | 185              | 61                                  | 4         |
| Ir <sub>1</sub> @Co/NC                     | 2.2 wt.%               | 60               | 119                                 | 5         |
| Pt@PCM                                     | 0.53 wt.%              | 106              | 65.3                                | 6         |
| Pt/NPSSF                                   | 10 wt.%                | 71.2             | 49.85                               | 7         |
| Pt/rGO/GCE                                 | 1.00 wt.%              | ~90              | 33                                  | 8         |
| Pt@PDG <sub>4</sub>                        | 6.97 wt%               | 70               | 26.52                               | 9         |
| Pt/h-BN(2:1)                               | -                      | 70.3             | 34                                  | 10        |
| 900-nm Pt nanopillar                       | -                      | 78               | 71                                  | 11        |
| Pt-Mo <sub>2</sub> C/TiO <sub>2</sub> NTAs | -                      | 67               | 39.3                                | 12        |
| Pt/V <sub>2</sub> CT <sub>x</sub>          | 17.4 wt%               | 67               | 20.6                                | 13        |
| Ni@C-10                                    | 0.49 wt%               | 40               | 31.7                                | 14        |
| MoS <sub>2</sub> @Pt-3                     | 0.26 at% (2.46 wt%)    | 70               | 36                                  | 15        |
| Pt NP/m-WO <sub>3-x</sub>                  | -                      | 150              | -                                   | 16        |
| Ru@WNO-C                                   | 0.9 wt%                | 172              | 38.9                                | 17        |



**Table S3.** Comparison of HER performance in alkaline media for Pt/CoP with the noble-metal based catalysts.

| <b>Catalysts</b>                    | <b>Loading of noble metal</b> | <b><math>\eta_{10}</math> (mV)</b> | <b>Tafel slope (mV dec<sup>-1</sup>)</b> | <b>Reference</b> |
|-------------------------------------|-------------------------------|------------------------------------|------------------------------------------|------------------|
| Pt/CoP                              | 0.12 at.%                     | 16                                 | 72.5                                     | This work        |
| Pt/NPSSF                            | -                             | 71.2                               | 76.8                                     | 7                |
| Pt@PDG <sub>4</sub>                 | 6.97 wt%                      | 55                                 | 95                                       | 9                |
| 450-nm Pt nanopillar                | -                             | 78                                 | 59                                       | 11               |
| Ru@WNO-C                            | 0.9 wt%                       | 24                                 | 39.7                                     | 17               |
| PtPd@NLS                            | 2.05 wt%                      | 46                                 | 124                                      | 18               |
| Pt/Ni(OH) <sub>2</sub> -nickel foam | -                             | 38                                 | 17                                       | 19               |
| Pt/Fe-NF                            | 2.050 wt%                     | 59.9                               | 40                                       | 20               |
| Pt NC/N-graphene-2                  | 5.0 wt%                       | 24                                 | 28                                       | 21               |
| Pt/Ni(OH) <sub>2</sub>              | -                             | 25.9                               | 37.6                                     | 22               |
| Pt-MoS <sub>2</sub>                 | 19.4 at.%                     | 120                                | 28                                       | 23               |
| Pt@PDG <sub>4</sub>                 | 1.0 at.%                      | 55                                 | 79.2                                     | 24               |
| Pt@MTO-S                            | -                             | 73                                 | 28                                       | 25               |
| PtNi <sub>5</sub> -0.3              | 18.2 wt.%                     | 26.8                               | 19.2                                     | 26               |
| Pt/NiRu-OH                          | 1.6 at.%                      | 38                                 | 39                                       | 27               |
| Pt-V <sub>2</sub> CT <sub>x</sub>   | 0.88 wt.%                     | 68.1                               | 98.6                                     | 28               |

## 1 Reference

- 2 1 A. Guha, T.V. Vineesh, A. Sekar, S. Narayanaru, M. Sahoo, S. Nayak, S. Chakraborty and  
3 T.N. Narayanan, *ACS Catal.*, 2018, **8**, 6636–6644.
- 4 2 H. Yu, Y. Xue, B. Huang, L. Hui, C. Zhang, Y. Fang, Y. Liu, Y. Zhao, Y. Li, H. Liu and Y.  
5 Li, *IScience.*, 2019, **11**, 31–41.
- 6 3 Q.-Q. Yan, D.-X. Wu, S.-Q. Chu, Z.-Q. Chen, Y. Lin, M.-X. Chen, J. Zhang, X.-J. Wu and  
7 H.-W. Liang, *Nat. Commun.*, 2019, **10**, 4977.
- 8 4 A. Han, X. Zhou, X. Wang, S. Liu, Q. Xiong, Q. Zhang, L. Gu, Z. Zhuang, W. Zhang, F. Li,  
9 D. Wang, L.-J. Li and Y. Li, *Nat. Commun.*, 2021, **12**, 709.
- 10 5 W. Lai, L. Zhang, W. Hua, S. Indris, Z. Yan, Z. Hu, B. Zhang, Y. Liu, L. Wang, M. Liu, R.  
11 Liu, Y. Wang, J. Wang, Z. Hu, H. Liu, S. Chou and S. Dou, *Angew. Chem. Int. Ed.*, 2019, **58**,  
12 11868–11873.
- 13 6 H. Zhang, P. An, W. Zhou, B.Y. Guan, P. Zhang, J. Dong and X.W. (David) Lou, *Sci. Adv.*,  
14 2018, **4**, eaao6657.
- 15 7 Y. Tan, Y.K. Wei, K.X. Liang, L.Y. Wang and S.H. Zhang, *Int. J. Hydrogen Energy*, 2021,  
16 **46**, 26340–26346.
- 17 8 S. Ghasemi, S.R. Hosseini and S. Nabipour, *J. Iran. Chem. Soc.*, 2019, **16**, 101–109.
- 18 9 Z.K. Li, F. Han, Z.W. Liu, Q.C. Peng, Q.D. Wang, M.M. Sun and G.J. Kang, *New J. Chem.*,  
19 2021, **45**, 21670–21675.
- 20 10 A. Guha, T.V. Vineesh, A. Sekar, S. Narayanaru, M. Sahoo, S. Nayak, S. Chakraborty and  
21 T.N. Narayanan, *ACS Catal.*, 2018, **8**, 6636–6644.
- 22 11 H.E. Cheng, W.L. Li and Z.P. Yang, *Int. J. Hydrogen Energy*, 2019, **44**, 30141–30150.

- 1 12 Y.L. Liu, L.L. Wan, J. Wang, L. Cheng, R.S. Chen and H.W. Ni, *Appl. Surf. Sci.*, 2020,  
2 **509**, 144679.
- 3 13 J.P. Wang, Y.F. Guan, Q. Zhang, H. Zhu, X.K. Li, Y.J. Li, Z.J. Dong, G.M. Yuan and Y.  
4 Cong, *Appl. Surf. Sci.*, 2022, **582**, 152481.
- 5 14 Y.P. Xiao, W.J. Wang, T.L. Li, Y.Y. Mao and C.L. Liu, *Electrochim. Acta*, 2021, **386**,  
6 138406.
- 7 15 X.Y. Xu, X.F. Dong, Z.J. Bao, R. Wang, J.G. Hu and H.B. Zeng, *J. Mater. Chem. A*, 2017,  
8 **5**, 22654–22661.
- 9 16 J. Park, S. Lee, H.-E. Kim, A. Cho, S. Kim, Y.J. Ye, J.W. Han, H. Lee, J.H. Jang and J. Lee,  
10 *Angew. Chem. Int. Ed.*, 2019, **58**, 16038–16042.
- 11 17 G. Meng, H. Tian, L.X. Peng, Z.H. Ma, Y.F. Chen, C. Chen, Z.W. Chang, X.Z. Cui and  
12 J.L. Shi, *Nano Energy*, 2021, **80**, 105531.
- 13 18 L. Huang, Y. Hou, Z. Yu, Z. Peng, L. Wang, J. Huang, B.G. Zhang, L. Qian, L.D. Wu and  
14 Z.C. Li, *Int. J. Hydrogen Energy*, 2017, **42**, 9458–9466.
- 15 19 H.-E. Cheng, S.-Y. Lin and D.-C. Tian, *J. Electrochem. Soc.*, 2014, **161**, E202–E206.
- 16 20 L.R. Huang, Y.P. Hou, Z.B. Yu, Z.B. Peng, L. Wang, J. Huang, B.G. Zhang, L. Qian, L.D.  
17 Wu and Z.C. Li, *Int. J. Hydrogen Energy*, 2017, **42**, 9458–9466.
- 18 21 B.B. Jiang, F. Liao, Y.Y. Sun, Y.F. Cheng and M.W. Shao, *Nanoscale*, 2017, **9**, 10138–  
19 10144.
- 20 22 Y.F. Gu, Y.Q. Wang, J.H. Shi, M.R. Yang, Y.C. Rui, W. An and Y. Men, *Int. J. Hydrogen*  
21 *Energy*, 2020, **45**, 27067–27077.
- 22 23 Y.L. Liao, C.J. Zhang, J. Ji, P. Jin and X.M. Zhou, *ChemNanoMat*, 2020, **6**, 435–441.

1 24 Z.K. Li, F. Han, Z.W. Liu, Q.C. Peng, Q.D. Wang, M.M. Sun and G.J. Kang, *New J.*  
2 *Chem.*, 2021, **45**, 21670–21675

3 25 P. Bhanja, B. Mohanty, A.K. Patra, S. Ghosh, B.K. Jena and A. Bhaumik, *ChemCatChem*,  
4 2019, **11**, 583–592.

5 26 C. Zhang, X. Liang, R.N. Xu, C.N. Dai, B. Wu, G.Q. Yu, B.H. Chen, X.L. Wang and N.  
6 Liu, *Adv. Funct. Mater.*, 2021, **31**, 2008298.

7 27 D. Li, X.F. Chen, Y.Z. Lv, G.Y. Zhang, Y. Huang, W. Liu, Y. Li, R.S. Chen, C. Nuckolls  
8 and H.W. Ni, *Appl. Catal. B Environ.*, 2020, **269**, 118824.

9 28 S. Park, Y.L. Lee, Y. Yoon, S.Y. Park, S. Yim, W. Song, S. Myung, K.S. Lee, H. Chang,  
10 S.S. Lee and K.S. An, *Appl. Catal. B Environ.*, 2022, **304**, 120989.

11 29 Z. Chen, D. Cummins, B.N. Reinecke, E. Clark, M.K. Sunkara and T.F. Jaramillo, *Nano*  
12 *Lett.*, 2011, **11**, 4168–4175.

13 30 J.D. Benck, Z.B. Chen, L.Y. Kuritzky, A.J. Forman and T.F. Jaramillo, *ACS Catal.*, 2012,  
14 **2**, 1916–1923.

15 31 J. Kibsgaard and T.F. Jaramillo, *Angewandte Chemie*, 2014, **126**, 14661–14665.

16 32 Y. Li, J. Hu, M.K. Zhang, W.Y. Gou, S. Zhang, Z. Chen, Y.Q. Qu and Y.Y. Ma, *Nat.*  
17 *Commun.*, 2021, **12**, 3502

18 33 J.Y. Li, Y. Tan, M.K. Zhang, W.Y. Gou, S. Zhang, Y.Y. Ma, J. Hu and Y.Q. Qu, *ACS*  
19 *Energy Lett.*, 2022, **7**, 1330–1337.
